# Supplementary material for: A layered hybrid rare-earth double perovskite with two continuous reversible phase transitions induced by unusual two driving gears of fan-like rotation movements
Source: Royal Society of Chemistry journal article supplement (doi:10.1039/d2ce01297a), 2022-01-01
Supplement: d2ce01297a1.pdf [file d2ce01297a1.pdf]

## Supporting Information

# A Layered Hybrid Rare-Earth Double Perovskite with Two Continuous Reversible Phase Transitions Induced By Unusual Two Driving Gears of Fan-Like Rotation Movements

Duo-Fu Li, <sup>a,b</sup> Feng Guo, <sup>a</sup> Xiao-Li He, <sup>b</sup> Yao-Zhen Wu, <sup>b</sup> Xiang-Hong Deng, <sup>b</sup> Kang-Ping Yang, <sup>b</sup> Yan Sui, <sup>a,b,\*</sup> Yong-Xiu Li<sup>a,\*</sup>

<sup>a</sup>College of Chemistry, Nanchang University, Nanchang 330031 P. R. China

<sup>b</sup>School of Chemistry and Chemical Engineering, The Key Laboratory of Coordination Chemistry of Jiangxi Province, Humic Acid Utilization Engineering Research Center of Jiangxi Province, Jingtangshan University, Ji'An, Jiangxi, 343009 P.R. China

**Table S1** Hydrogen Bonds for **1** at 233 K

| D-H-A                 | d(D-H)/Å | d(H-A)/Å | d(D-A)/Å | D-H-A/° |
|-----------------------|----------|----------|----------|---------|
| N5-H5-O2 <sup>1</sup> | 0.98     | 2.32     | 3.101(5) | 135.6   |
| N5-H5-O3 <sup>1</sup> | 0.98     | 2.01     | 2.963(6) | 164.7   |
| N6-H6-O1 <sup>2</sup> | 0.98     | 2.00     | 2.941(5) | 159.2   |

N6-H6-O2<sup>2</sup> 0.98 2.30 3.043(5) 132.2

Symmetric code: <sup>1</sup>-1/2+X,1-Y,+Z; <sup>2</sup>+X,1+Y,+Z

**Table S2** Hydrogen Bonds for **1** at 273 K

| D-H-A    | d(D-H)/Å | d(H-A)/Å | d(D-A)/Å | D-H-A/° |
|----------|----------|----------|----------|---------|
| N5-H5-O1 | 0.91     | 2.14     | 3.002(8) | 157.6   |
| N5-H5-O2 | 0.91     | 2.25     | 3.024(8) | 142.6   |
| N6-H6-O2 | 0.91     | 2.35     | 3.070(7) | 135.6   |
| N6-H6-O3 | 0.91     | 2.10     | 2.986(8) | 165.0   |

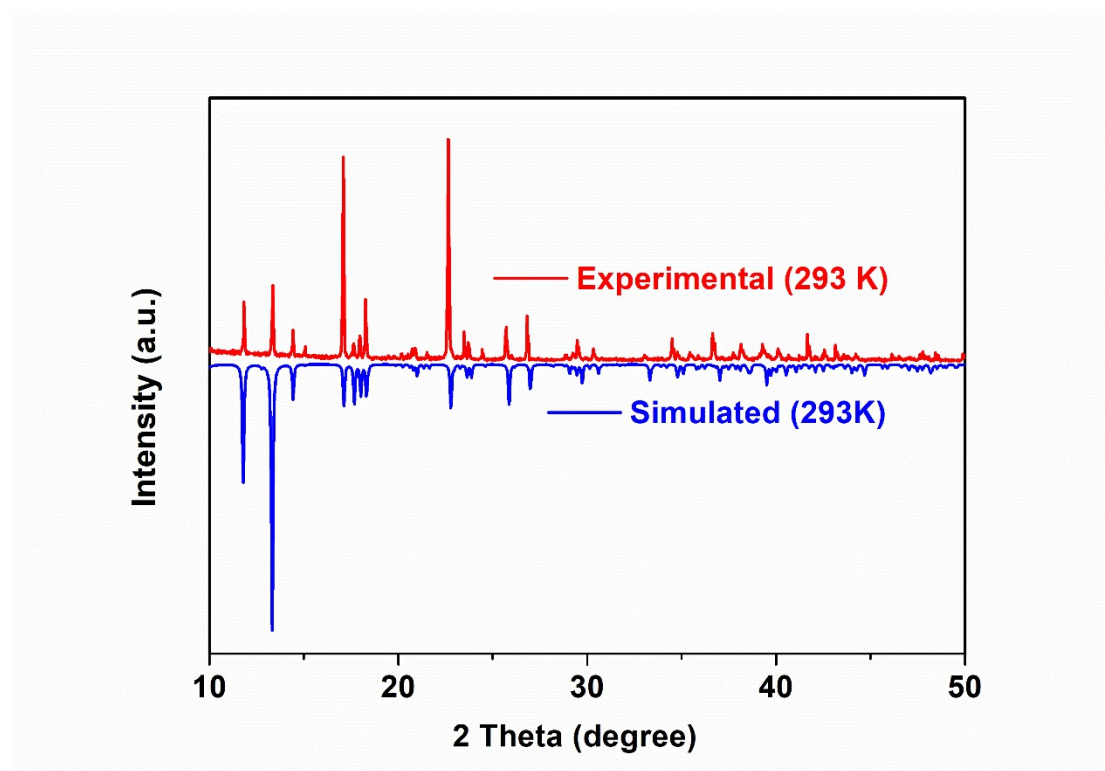

**Figure S1** The simulated and experimental PXRD of **1** at 293 K

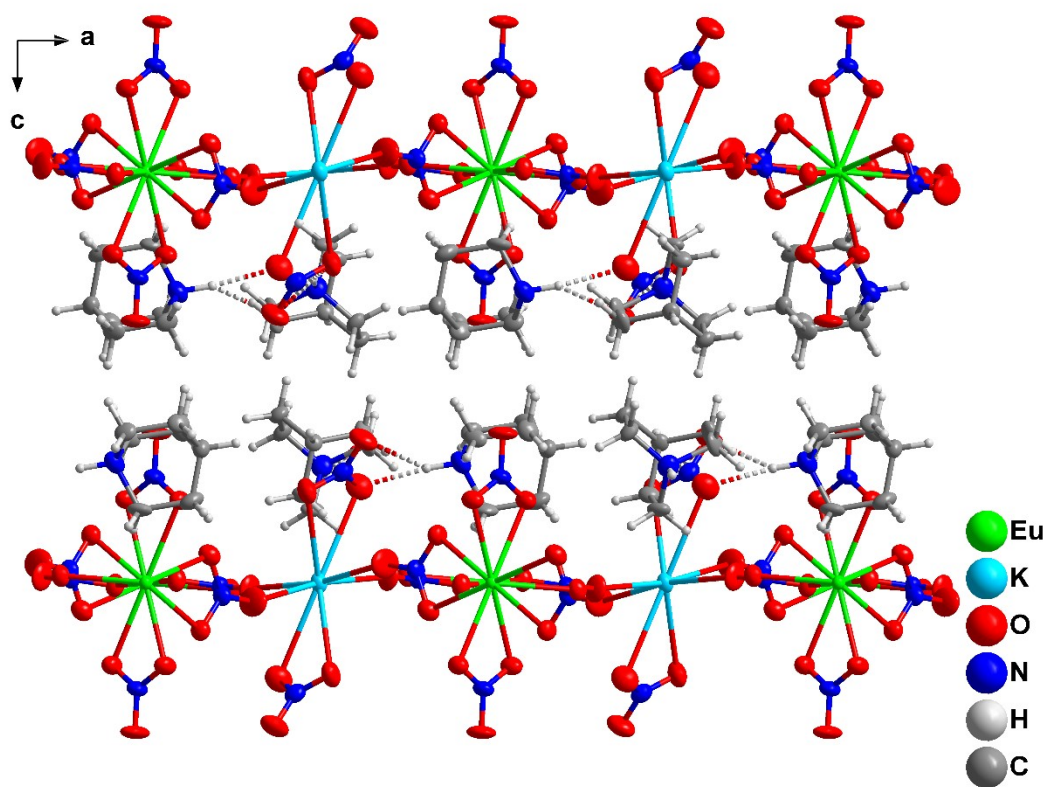

**Figure S2** The crystal packing diagram of 1 along *b* axis at 233 K.

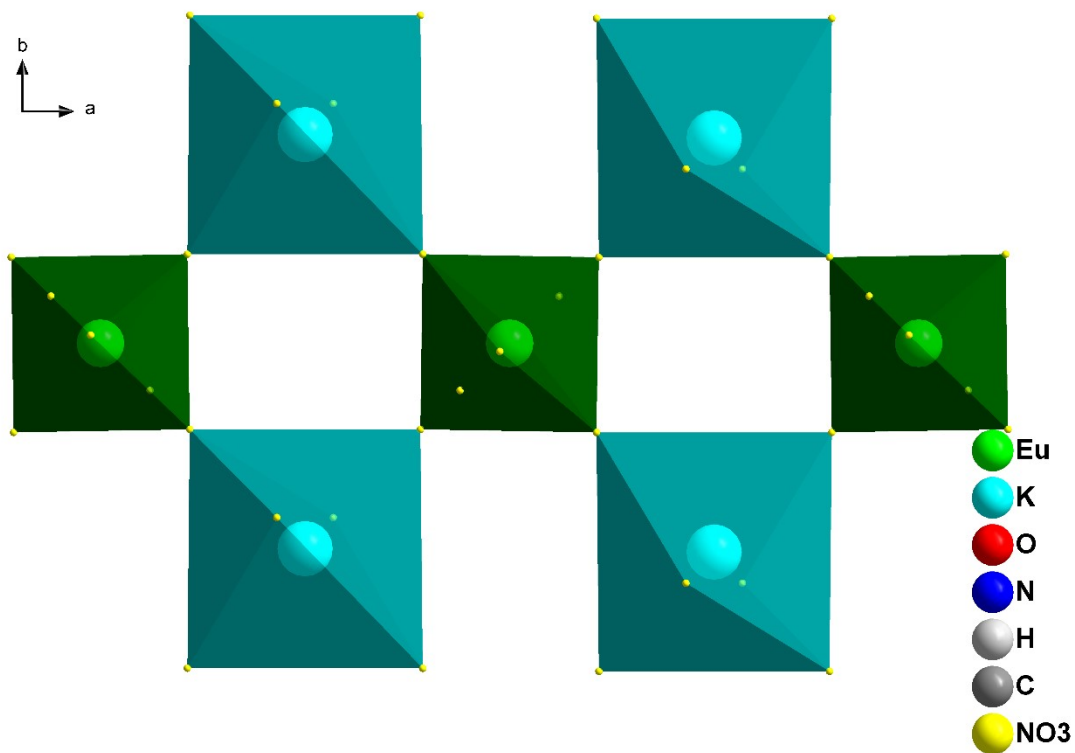

**Figure S3** The inorganic framework of 1 at 233 K

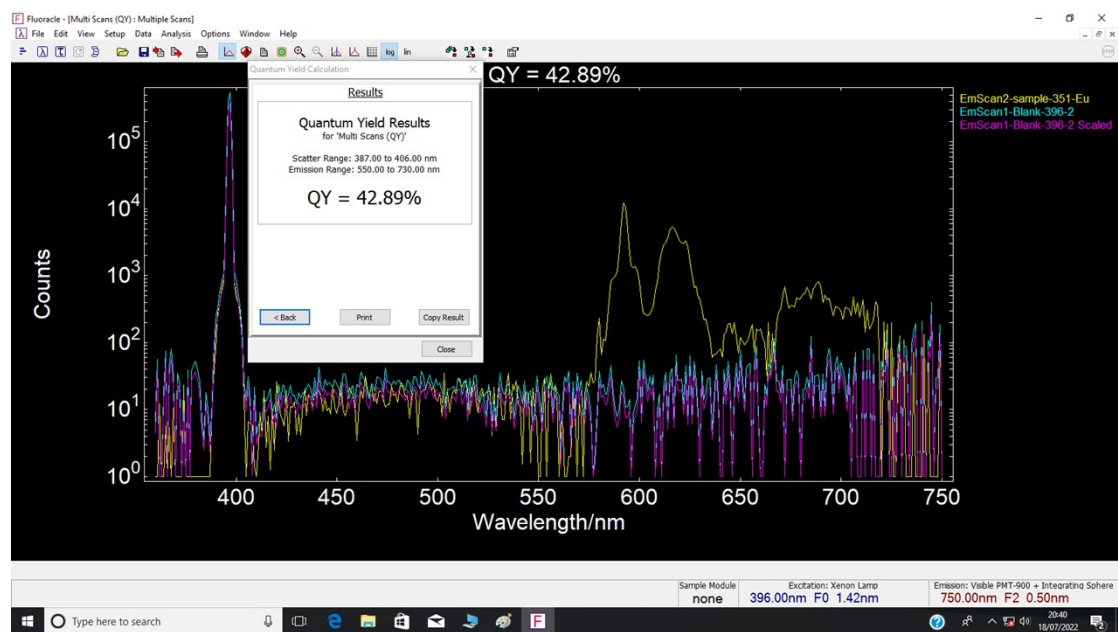

**Figure S4** The absolute quantum yield (QY) of **1** in the solid state using an integrating sphere at room temperature.
